# Supplementary material for: A Rapid Gas-Chromatography/Mass-Spectrometry Technique for Determining Odour Activity Values of Volatile Compounds in Plant Proteins: Soy, and Allergen-Free Pea and Brown Rice Protein
Source: MDPI journal article supplement (doi:10.3390/molecules26134104), 2021-07-05
Supplement: s1 [file s1]

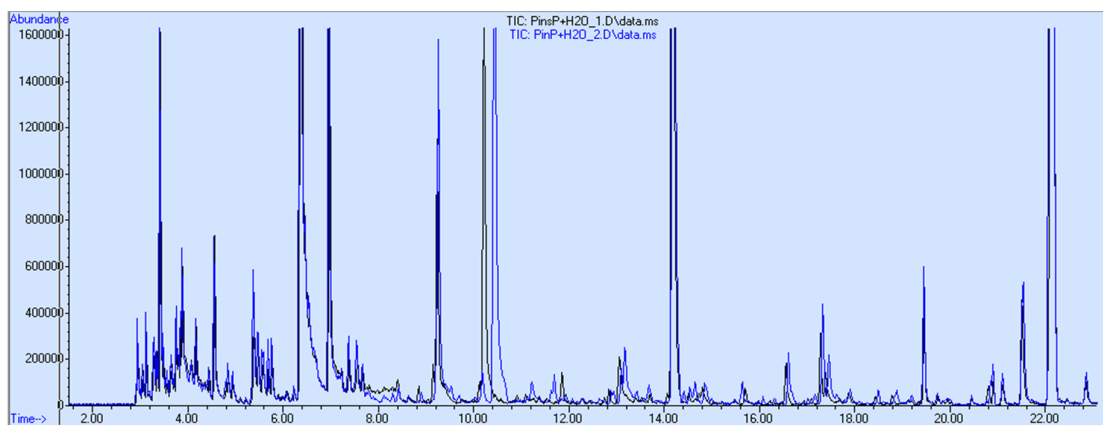

**Figure S1.** Comparison of chromatogram resolution of pea protein isolates with a 10 min equilibration Table 30. min equilibration time (blue).

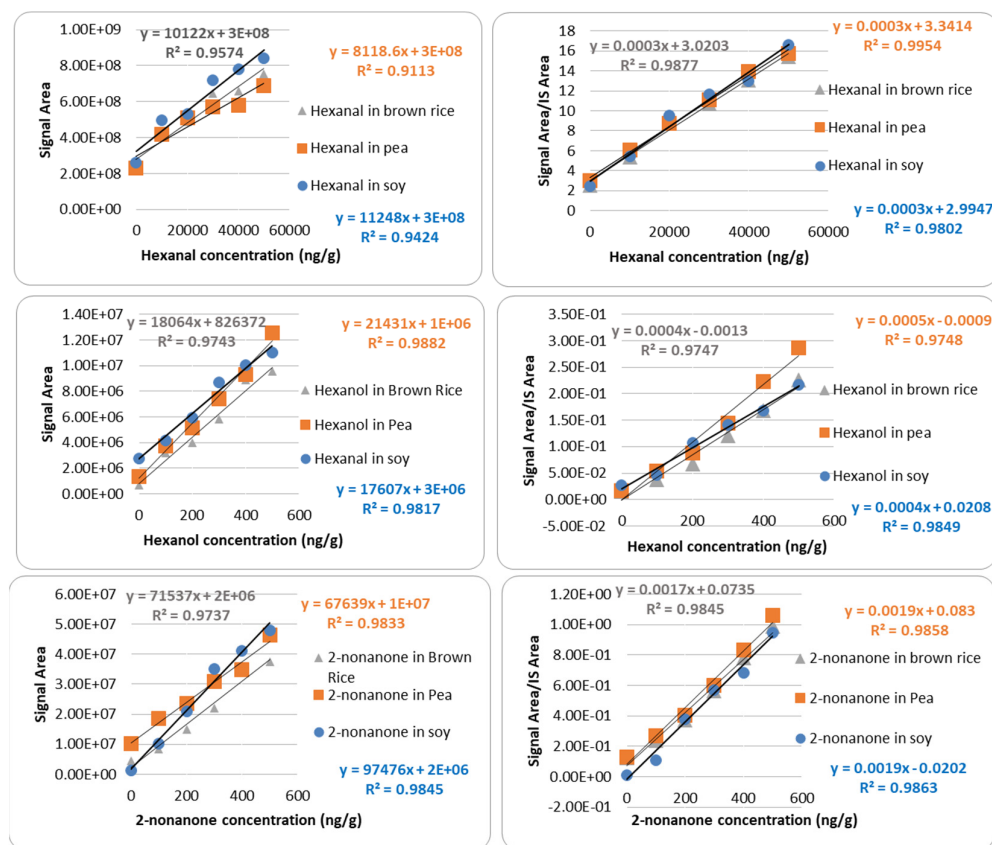

**Figure S2.** Calibration curves generated for hexanal, 1-hexanol and 2-nonanone in pea and soy protein isolates (calibration curves in red are for pea, and that in blue are for soy).

**Table S1.** Volatile profile of soy protein, allergen-free pea protein, and allergen-free brown rice protein.

| Protein        | Compound Identification<br>(Name, CAS, Formula,<br>Molar Mass,<br>OTV(Odour Threshold Value))            | Retention<br>Time | Aroma                                                      | Concentration<br>(in ng/g) <sup>1</sup> | Odor Activity<br>Value<br><br>OAV = ln<br>(conc./OTV) |
|----------------|----------------------------------------------------------------------------------------------------------|-------------------|------------------------------------------------------------|-----------------------------------------|-------------------------------------------------------|
| soy<br>protein | Pentane, all isomers 78-78-4, 109-66-0, 463-82-1<br>C <sub>5</sub> H <sub>12</sub><br>72.15<br>1290      | 2.94              | Gasoline-like                                              | 60.36 ± 23.56                           | Below Threshold                                       |
|                | n-Hexane<br>110-54-3<br>C <sub>6</sub> H <sub>14</sub><br>86.17<br>1500                                  | 2.30              | Gasoline-like                                              | 25.59 ± 13.80                           | Below Threshold                                       |
|                | Octane, all isomers<br>111-65-9, 540-84-1, 86290-81-5<br>C <sub>8</sub> H <sub>18</sub><br>114.22<br>660 | 3.40              | Green, minty,<br>herbal,<br>rosemary,<br>cooling           | 29.67 ± 15.60                           | Below Threshold                                       |
|                | Furfural<br>98-01-1<br>C <sub>5</sub> H <sub>4</sub> O <sub>2</sub><br>96.08<br>2                        | 4.12              | Chemical,<br>beany, bready,<br>malty                       | 108.76 ± 34.25                          | 4.00                                                  |
|                | n-Valeraldehyde (Pentanal)<br>110-62-3<br>C <sub>5</sub> H <sub>10</sub> O<br>86.13<br>0.4               | 4.50              | Fermented,<br>bready, fruity,<br>nutty, berry              | 89.12 ± 16.04                           | 5.41                                                  |
|                | Hexanal<br>66-25-1<br>C <sub>6</sub> H <sub>12</sub> O<br>100.16<br>97                                   | 6.35              | Grassy, tallow,<br>fatty, greeny                           | 1621.71 ± 159.69                        | 2.82                                                  |
|                | 2-Heptanone (Methyl n-amyl Ketone)<br>110-43-0<br>C <sub>7</sub> H <sub>14</sub> O<br>114.18<br>140      | 9.18              | Soapy, sweet,<br>mushroom                                  | 72.63 ± 7.88                            | Below Threshold                                       |
|                | Furan, 2-pentyl<br>3777-69-3<br>C <sub>9</sub> H <sub>14</sub> O<br>138.21<br>6                          | 10.52             | Fruity, green,<br>earthy, beany,<br>vegetable,<br>metallic | 2492.3 ± 199.4                          | 6.03                                                  |
|                | 2-Octanone<br>111-13-7<br>C <sub>8</sub> H <sub>16</sub> O<br>128.21<br>50                               | 13.01             | Soapy, fruity                                              | 2.86 ± 2.51                             | Below Threshold                                       |
|                | 3-Octen-2-one<br>4312-99-6<br>C <sub>8</sub> H <sub>14</sub> O<br>126.2                                  | 17.82             | Mushroom,<br>mouldy, burnt                                 | 12.03 ± 0.17                            | 7.79                                                  |
|                | 1-Octen-3-ol<br>3391-86-4<br>C <sub>8</sub> H <sub>16</sub> O<br>128.2<br>1.08                           | 19.43             | Mushroomy,<br>earthy, burnt                                | 40.21 ± 9.61                            | 3.62                                                  |
|                | Benzaldehyde<br>100-52-7<br>C <sub>7</sub> H <sub>6</sub> O<br>106.12                                    | 21.24             | Almond, burnt<br>sugar,<br>marchpane                       | 286.96 ± 25.56                          | 5.25                                                  |

|                          |                                                                                           |       |                                                            |                     |                 |
|--------------------------|-------------------------------------------------------------------------------------------|-------|------------------------------------------------------------|---------------------|-----------------|
| pea<br>protein           | 1.5                                                                                       |       |                                                            |                     |                 |
|                          | Octane, all isomers<br>111-65-9, 540-84-1, 86290-<br>81-5<br>$C_8H_{18}$<br>114.22<br>660 | 3.4   | Green, minty,<br>herbal,<br>rosemary,<br>cooling           | $25.48 \pm 23.98$   | Below Threshold |
|                          | n-Valeraldehyde (Pentanal)<br>110-62-3<br>$C_5H_{10}O$<br>86.13<br>0.4                    | 4.50  | Fermented,<br>bready, fruity,<br>nutty, berry              | $90.65 \pm 13.48$   | 5.42            |
|                          | Decane<br>124-18-5<br>$C_{10}H_{22}$<br>142.28<br>11                                      | 5.41  | Gasoline-like                                              | $15.88 \pm 15.91$   | 0.37            |
|                          | Hexanal<br>66-25-1<br>$C_6H_{12}O$<br>100.16<br>97                                        | 6.35  | Grassy, tallow,<br>fatty, greeny                           | $1138.00 \pm 297.3$ | 2.46            |
|                          | Undecane<br>1120-21-4<br>$C_{11}H_{24}$<br>156.31<br>620                                  | 7.61  | Green, minty,<br>herbal,<br>rosemary,<br>cooling           | $35.32 \pm 62.71$   | Below Threshold |
|                          | 2-Heptanone (Methyl n-<br>amyl Ketone)<br>110-43-0<br>$C_7H_{14}O$<br>114.18<br>140       | 9.18  | Soapy, sweet,<br>mushroom                                  | $25.64 \pm 8.099$   | Below Threshold |
|                          | Furan, 2-pentyl<br>3777-69-3<br>$C_9H_{14}O$<br>138.21<br>6                               | 10.52 | Fruity, green,<br>earthy, beany,<br>vegetable,<br>metallic | $638.17 \pm 49$     | 4.67            |
|                          | Dodecane<br>112-40-3<br>$C_{12}H_{26}$<br>170.33<br>110                                   | 11.42 | --                                                         | $77.93 \pm 59.84$   | Below Threshold |
|                          | 2-Nonanone<br>821-55-6<br>$C_9H_{18}O$<br>142.24<br>5                                     | 17.24 | Hot milk,<br>soapy, greeny                                 | $6.382 \pm 0.6214$  | 0.24            |
|                          | Nonanal<br>124-19-6<br>$C_9H_{18}O$<br>142.24<br>1                                        | 17.35 | Fat, citrus,<br>greeny                                     | $31.82 \pm 5.51$    | 3.46            |
|                          | Benzaldehyde<br>100-52-7<br>$C_7H_6O$<br>106.12<br>1.5                                    | 21.24 | Almond, burnt<br>sugar,<br>marchpane                       | $99.19 \pm 4.22$    | 4.19            |
|                          | 3, 5-Octadien-2-one<br>38284-27-4<br>$C_8H_{12}O$<br>124.18<br>300                        | 23.87 | Fruity, fatty,<br>mushroom like                            | $48.71 \pm 5.575$   | Below Threshold |
| brown<br>rice<br>protein | Pentane, all isomers 78-78-<br>4, 109-66-0, 463-82-1<br>$C_5H_{12}$<br>72.15<br>1290      | 2.94  | Gasoline-like,<br>sweet                                    | $79.43 \pm 4.97$    | Below Threshold |

|                                                                                                                                        |       |                                                                                                      |                       |                 |
|----------------------------------------------------------------------------------------------------------------------------------------|-------|------------------------------------------------------------------------------------------------------|-----------------------|-----------------|
| Heptane, all isomers<br>142-82-5, 590-35-2, 565-59-3<br>108-08-7, 591-76-4, 589-34-4<br>C <sub>7</sub> H <sub>16</sub><br>100.2<br>410 | 3.12  | Petroleum-like                                                                                       | 167.98 ± 36.44        | Below Threshold |
| Acetone<br>67-64-1<br>C <sub>3</sub> H <sub>6</sub> O<br>58.08<br>20000                                                                | 3.33  | Solvent,<br>ethereal, apple,<br>pear                                                                 | 11.38 ± 1.89          | Below Threshold |
| Octane, all isomers<br>111-65-9, 540-84-1, 86290-81-5<br>C <sub>8</sub> H <sub>18</sub><br>114.22<br>660                               | 3.4   | Green, minty,<br>herbal,<br>rosemary,<br>cooling                                                     | 652.63 ± 40.77        | Below Threshold |
| Butyraldehyde<br>123-72-8<br>C <sub>4</sub> H <sub>8</sub> O<br>72.11<br>0.3                                                           | 3.6   | Pungent, <sub>1</sub> cocoa, <sub>2</sub><br>musty, <sub>2</sub> green<br>malty, <sub>2</sub> bready | 137.19 ± 27.93        | 6.13            |
| n-Valeraldehyde<br>(Pentanal)<br>110-62-3<br>C <sub>5</sub> H <sub>10</sub> O<br>86.13<br>0.4                                          | 4.5   | Fermented, <sub>1</sub><br>bready, <sub>2</sub> fruity, <sub>2</sub><br>nutty, <sub>2</sub> berry    | 1837.33 ± 200.36      | 8.43            |
| Toluene<br>108-88-3<br>C <sub>7</sub> H <sub>8</sub><br>92.13<br>21                                                                    | 5.3   | Sweet                                                                                                | 141.19 ± 17.08        | 1.91            |
| Decane<br>124-18-5<br>C <sub>10</sub> H <sub>22</sub><br>142.28<br>11                                                                  | 5.41  | Gasoline-like                                                                                        | 89.78 ± 7.51          | 2.10            |
| Furfuryl Alcohol (2-furan<br>methanol)<br>98-00-0<br>C <sub>5</sub> H <sub>6</sub> O <sub>2</sub><br>98.1<br>8000                      | 5.69  | sweet, ether,<br>alcohol                                                                             | 53.81 ± 6.53          | Below Threshold |
| Hexanal<br>66-25-1<br>C <sub>6</sub> H <sub>12</sub> O<br>100.16<br>97                                                                 | 6.35  | Grassy, tallow,<br>fatty, greeny                                                                     | 22590.24 ±<br>1643.70 | 5.45            |
| 2-n-Butyl furan<br>4466-24-4<br>C <sub>8</sub> H <sub>12</sub> O<br>124.18<br>51                                                       | 7.12  | Mild, fruity,<br>wine, sweet,<br>spicy                                                               | 386.40 ± 30.64        | 2.03            |
| 5-undecene<br>764-96-5<br>C <sub>11</sub> H <sub>22</sub><br>154.3<br>5                                                                | 8.1   | pleasant,<br>butter-like                                                                             | 1410.36±296.77        | 5.64            |
| 2-Heptanone (Methyl n-<br>amyl Ketone)<br>110-43-0<br>C <sub>7</sub> H <sub>14</sub> O<br>114.18                                       | 9.18  | Soapy, sweet,<br>mushroom                                                                            | 782.30 ± 81.94        | 1.72            |
| Isophorone<br>78-59-1<br>C <sub>9</sub> H <sub>14</sub> O                                                                              | 10.61 | sharp                                                                                                | 120.13 ± 104.12       | Below Threshold |

|                                                                                                                                                                   |       |                                                                                       |                  |                 |
|-------------------------------------------------------------------------------------------------------------------------------------------------------------------|-------|---------------------------------------------------------------------------------------|------------------|-----------------|
| 138.2                                                                                                                                                             |       |                                                                                       |                  |                 |
| 190                                                                                                                                                               |       |                                                                                       |                  |                 |
| 2-Methylcyclohexanone<br>583-60-8<br><chem>C7H12O</chem><br>112.17<br>181                                                                                         | 10.93 |                                                                                       | 147.85 ± 9.88    | Below Threshold |
| Pentanol, all isomers 71-41-0, 75-85-4, 75-84-3, 123-51-3, 137-32-6, 584-02-1, 598-75-4, 6032-29-7, 30899-19-5, 94624-12-1<br><chem>C5H12O</chem><br>88.15<br>5.5 | 11.45 | Fruity                                                                                | 1171.26 ± 31.66  | 5.36            |
| Diallylamine<br>124-02-7<br><chem>C6H11N</chem><br>97.16<br>2                                                                                                     | 12.75 | Disagreeable,<br>refreshing                                                           | 113.44 ± 10.41   | 4.04            |
| 2-Octanone<br>111-13-7<br><chem>C8H16O</chem><br>128.21                                                                                                           | 13.01 | Soapy, fruity                                                                         | 109.19 ± 11.15   | 0.78            |
| Octanal<br>124-13-0<br><chem>C8H16O12</chem><br>8.21<br>2                                                                                                         | 13.22 | Fatty, soap,<br>lemon, green,<br>orange, sweet                                        | 981.91 ± 97.88   | 6.20            |
| 2-Heptenal (Butylacrolein)<br>18829-55-5<br><chem>C7H12O</chem><br>112.17<br>10                                                                                   | 14.47 | Green type<br>flavor                                                                  | 134.37 ± 22.74   | 2.60            |
| 2-hexenal, 2-methyl<br>28467-88-1<br><chem>C7H12O</chem><br>112.17<br>17                                                                                          | 14.87 |                                                                                       | 1716.45 ± 112.42 | 4.62            |
| Dimethyl trisulfide<br>3658-80-8<br><chem>C2H6S3</chem><br>0.001                                                                                                  | 15.46 | Sulfurous,<br>onion, cooked,<br>onion, savory,<br>meaty                               | 273.51 ± 43.22   | 12.52           |
| 2-heptenal, 2-methyl<br>30567-26-1<br><chem>C8H14O</chem><br>13                                                                                                   | 15.64 |                                                                                       | 1717.48 ± 204.72 | 4.88            |
| 1-Hexanol (n-Hexyl<br>Alcohol)<br>111-27-3<br><chem>C6H14O</chem><br>102.18<br>2.4                                                                                | 15.66 | Resin, flowery,<br>greeny                                                             | 102.04 ± 9.30    | 3.75            |
| Hexanethioic acid, S-methyl<br>ester (S-Methyl<br>hexanethioate)<br>2432-77-1<br><chem>C7H14OS</chem><br>146.25<br>0.3                                            | 17.06 | Fruity, ethereal,<br>green, tropical,<br>cabbage,<br>cheesy, rancid,<br>floral, green | 169.03 ± 21.49   | 6.33            |
| 2-Nonanone<br>821-55-6<br><chem>C9H18O</chem><br>142.24                                                                                                           | 17.24 | Hot milk,<br>soapy, greeny                                                            | 94.02 ± 12.38    | 2.93            |
| Nonanal<br>124-19-6                                                                                                                                               | 17.35 | Fat, citrus,<br>greeny                                                                | 1129.05 ± 187.18 | 7.03            |

|                                                                                                |       |                                      |                 |                 |
|------------------------------------------------------------------------------------------------|-------|--------------------------------------|-----------------|-----------------|
| C <sub>9</sub> H <sub>18</sub> O<br>142.24<br>1                                                |       |                                      |                 |                 |
| 3-Octen-2-one<br>4312-99-6<br>C <sub>8</sub> H <sub>14</sub> O<br>126.2                        | 17.82 | Mushroom,<br>mouldy, burnt           | 389.34 ± 46.50  | 11.26           |
| 1-TRIDECENE<br>2437-56-1<br>C <sub>13</sub> H <sub>26</sub><br>182.35<br>1200                  | 18.44 | Mild, pleasant.                      | 137.54 ± 14.33  | Below Threshold |
| 2-Octenal<br>2548-87-0<br>C <sub>8</sub> H <sub>14</sub> O<br>126.20<br>3                      | 18.74 | Fatty                                | 450.75 ± 47.30  | 5.01            |
| 5-decanone (Methyl Octyl<br>Ketone)<br>693-54-9<br>C <sub>10</sub> H <sub>20</sub> O<br>156.26 | 18.9  | Fermented                            | 34.98 ± 4.65    | Below Threshold |
| 1-Octen-3-ol,<br>3391-86-4<br>C <sub>8</sub> H <sub>16</sub> O<br>128.2<br>1.08                | 19.43 | Mushroomy,<br>earthy, burnt          | 1850.47±221.00  | 7.45            |
| 1-Heptanol,<br>111-70-6<br>C <sub>7</sub> H <sub>15</sub> OH<br>116<br>3                       | 19.71 | Greeny                               | 421.46 ± 44.14  | 4.95            |
| 2,6-Dimethyl-5-heptenal<br>106-72-9<br>C <sub>9</sub> H <sub>16</sub> O<br>140.22<br>16        | 19.89 | --                                   | 125.05 ± 111.33 | 2.06            |
| Benzaldehyde<br>100-52-7<br>C <sub>7</sub> H <sub>6</sub> O<br>106.12<br>1.5                   | 21.24 | Almond, burnt<br>sugar,<br>marchpane | 2798.73±367.53  | 7.53            |
| 2-heptenal, 2-propyl<br>532-27-4<br>C <sub>10</sub> H <sub>18</sub> O<br>154.59<br>16          | 21.61 | fruity                               | 121.15 ± 11.04  | 2.02            |
| Diisobutyl Ketone<br>108-83-8<br>C <sub>9</sub> H <sub>18</sub> O<br>142.24<br>103             | 21.89 | Peppermint                           | 263.69 ± 26.34  | 0.94            |
| n-Butyl Acrylate<br>141-32-2<br>C <sub>7</sub> H <sub>12</sub> O <sub>2</sub><br>128.17<br>0.3 | 22.58 | sweet, rancid,<br>plastic            | 118.36 ± 10.74  | 5.98            |
| Ethyl Amyl Ketone<br>541-85-5<br>C <sub>8</sub> H <sub>16</sub> O<br>128.21<br>5900            | 22.65 | solvent, sharp                       | 89.24 ± 56.36   | Below Threshold |
| 6-Undecanone (Diamyl<br>ketone) 927-49-1<br>C <sub>11</sub> H <sub>22</sub> O<br>170.29<br>7   | 22.9  |                                      | 94.74 ± 9.57    | 2.61            |

|                                                                                       |       |                                                                                                           |                      |                 |
|---------------------------------------------------------------------------------------|-------|-----------------------------------------------------------------------------------------------------------|----------------------|-----------------|
| 1-Octanol<br>111-87-5<br><chem>C8H18O</chem><br>130.23<br>0.9                         | 23.71 | Waxy green,<br>orange,<br>aldehydic,<br>rose,<br>mushroom                                                 | $397.56 \pm 56.36$   | 6.09            |
| 3, 5-Octadien-2-one<br>38284-27-4<br><chem>C8H12O</chem><br>124.18<br>300             | 23.87 | Fruity, fatty,<br>mushroom like                                                                           | $30.40 \pm 2.82$     | Below Threshold |
| 2-Octenal, 2-butyl<br>13019-16-4<br><chem>C12H22O</chem><br>182.30<br>3               | 24.25 | fruity,<br>pineapple,<br>green,<br>aldehydic,<br>sweet, ripe<br>juicy flavor                              | $5906.10 \pm 807.06$ | 3.49            |
| Valeric acid (Pentanoic<br>acid)<br>109-52-4<br><chem>C5H10O2</chem><br>102.13<br>940 | 28.8  | Acidic, sweaty,<br>rancid                                                                                 | $225.04 \pm 47.34$   | Below Threshold |
| 2,4-Nonadienal<br>6750-03-4<br><chem>C9H14O</chem><br>138.21<br>0.5                   | 28.9  | Fatty, melon,<br>waxy, green,<br>violet, leaf,<br>cucumber,<br>fruit, tropical,<br>fruit, chicken,<br>fat | $126.44 \pm 22.71$   | 5.53            |
| 1-Decene<br>872-05-9<br><chem>C10H20</chem><br>140.27<br>6450                         | 33.79 | pleasant                                                                                                  | $192.21 \pm 29.43$   | Below Threshold |
